# Supplementary material for: Usnic Acid Isolated from Usnea antarctica (Du Rietz) Reduced In Vitro Angiogenesis in VEGF- and bFGF-Stimulated HUVECs and Ex Ovo in Quail Chorioallantoic Membrane (CAM) Assay
Source: MDPI journal article supplement (doi:10.3390/life12091444), 2022-09-16
Supplement: s1 [file s1]

# Usnic Acid Isolated from *Usnea antarctica* (Du Rietz) Reduced In Vitro Angiogenesis in VEGF- and b-FGF- Stimulated HUVECs and Ex Ovo in Quail Chorioallantoic Membrane (CAM) Assay

Klaudia Petrová<sup>1\*</sup>, Miriam Bačkorová<sup>2</sup>, Zuzana Demčíšáková<sup>3</sup>, Eva Petrovová<sup>3</sup>, Richard Frenák<sup>4</sup>,  
Michal Goga<sup>4</sup>, Martin Bačkor<sup>4,5</sup>, Ján Mojžiš<sup>1</sup>, and Martin Kello<sup>1\*</sup>

- <sup>1</sup> Department of Pharmacology, Faculty of Medicine, Pavol Jozef Šafárik University, 040 01 Košice, Slovakia
- <sup>2</sup> Department of Pharmaceutical Technology, Pharmacognosy, and Botany, University of Veterinary Medicine and Pharmacy, 041 81, Košice, Slovakia
- <sup>3</sup> Department of Anatomy, Histology, and Physiology, University of Veterinary Medicine and Pharmacy, 041 81 Košice, Slovakia
- <sup>4</sup> Department of Botany, Institute of Biology and Ecology, Faculty of Science, Pavol Jozef Šafárik University, Mánesova 23, 041 67, Košice, Slovakia
- <sup>5</sup> Institute of Biotechnology, Faculty of Biotechnology and Food Sciences, Slovak University of Agriculture in Nitra, Trieda Andreja Hlinku 2, 949 76, Nitra, Slovakia; \*  
Correspondence: claudy.petrova@gmail.com (K.P.); kellomartin@yahoo.com (M.K.)

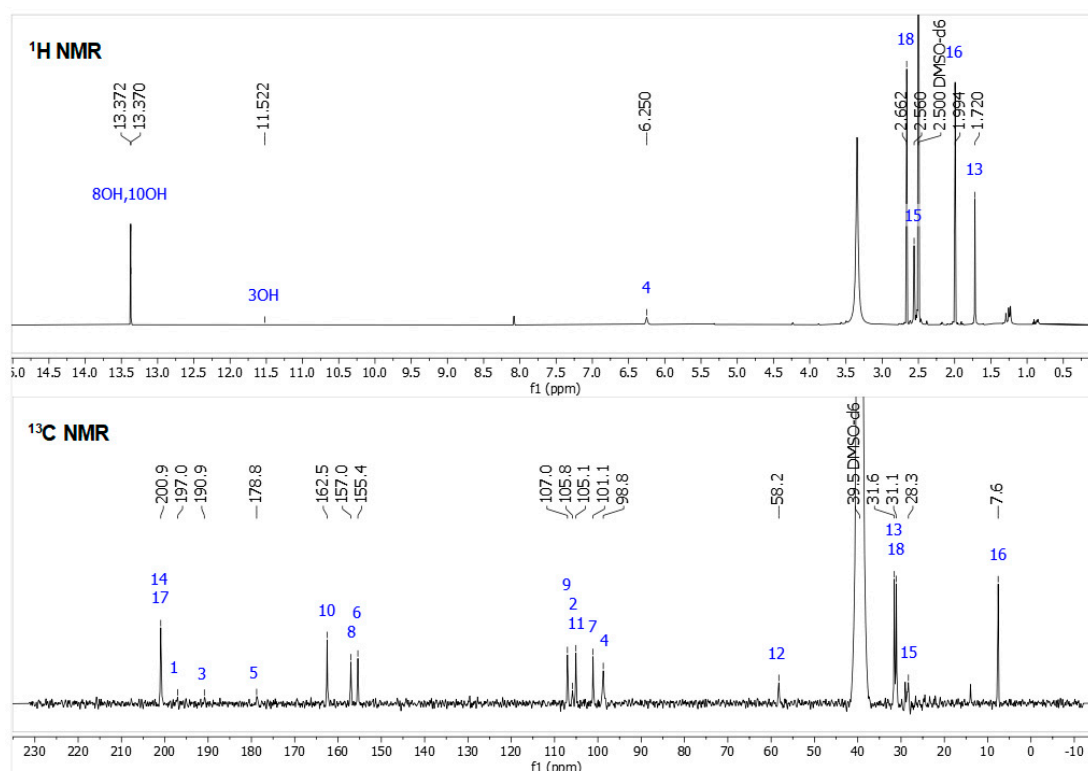

Figure S1. <sup>1</sup>H (600 MHz, DMSO-d<sub>6</sub>) and <sup>13</sup>C (150 MHz, DMSO-d<sub>6</sub>) NMR spectra of usnic acid.

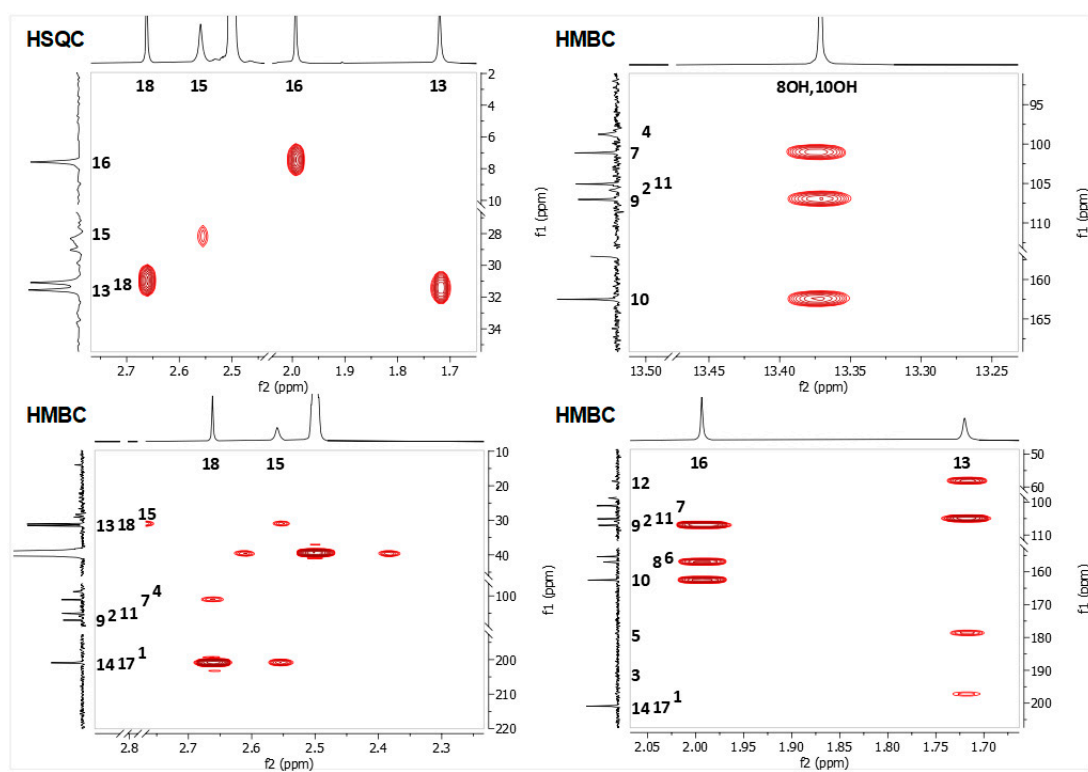

**Figure S2.** HSQC and HMBC spectra of usnic acid.

**Table S1.**  $^1\text{H}$  and  $^{13}\text{C}$  NMR chemical shifts of isolated usnic acid in DMSO- $d_6$ .

| 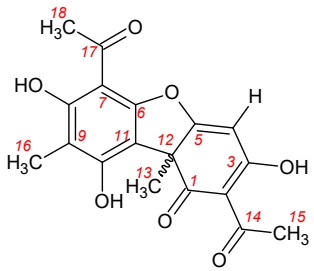 |                              |                              |                                                     |
|------------------------------------------------------------------------------------|------------------------------|------------------------------|-----------------------------------------------------|
| No.                                                                                | $\delta_{\text{H}}$<br>[ppm] | $\delta_{\text{C}}$<br>[ppm] | HMBC correlations                                   |
| 1                                                                                  |                              | 197.0                        |                                                     |
| 2                                                                                  |                              | 105.8                        |                                                     |
| 3                                                                                  | 11.33*                       | 190.9                        |                                                     |
| 4                                                                                  | 6.31                         | 98.8                         |                                                     |
| 5                                                                                  |                              | 178.8                        |                                                     |
| 6                                                                                  |                              | 155.4                        |                                                     |
| 7                                                                                  |                              | 101.1                        |                                                     |
| 8                                                                                  | 13.37*                       | 157.0                        | 101.1 (C-7), 107.0 (C-9)                            |
| 9                                                                                  |                              | 107.0                        |                                                     |
| 10                                                                                 | 13.37*                       | 162.5                        |                                                     |
| 11                                                                                 |                              | 105.1                        |                                                     |
| 12                                                                                 |                              | 58.2                         |                                                     |
| 13                                                                                 | 1.74                         | 31.6                         | 58.2 (C-12), 105.1 (C-11), 178.8 (C-5), 197.0 (C-1) |
| 14                                                                                 |                              | 201.0                        |                                                     |
| 15                                                                                 | 2.59                         | 28.3                         | 105.8 (C-2), 201.0 (C-14)                           |
| 16                                                                                 | 2.00                         | 7.6                          | 107.0 (C-9), 157.0 (C-8), 162.5 (C-10)              |
| 17                                                                                 |                              | 201.0                        |                                                     |
| 18                                                                                 | 2.67                         | 31.1                         | 101.1 (C-7), 201.0 (C-17)                           |

\*  $^1\text{H}$  chemical shift of OH proton

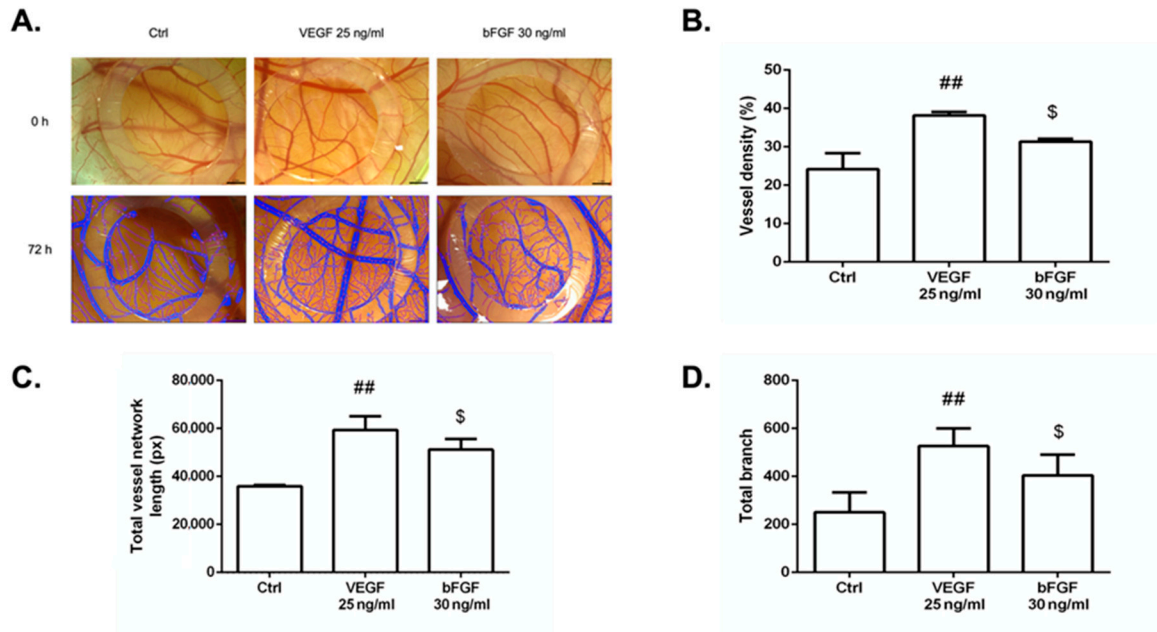

**Figure S3:** Proangiogenic effect of VEGF (25ng/ml) and bFGF (30ng/ml) on CAM vascularization (**A**). The results are summarized in the graphs as vessel density (**B**), total vessel network length (**C**), and total branch (**D**). Each group contained 10 CAMs and the experiment was repeated three times. Error bars represent  $\pm$  SD (<sup>##</sup> $p < 0.01$  versus VEGF; <sup>\$</sup> $p < 0.05$  versus bFGF).
